# Supplementary material for: A simplified approach for measuring Rubisco carbon isotope fractionation and the first determination in marine haptophyte Gephyrocapsa oceanica
Source: Copernicus journal article supplement (doi:10.5194/egusphere-2025-5010), 2025-10-16
Supplement: Supplementary file [file egusphere-2025-5010-AC1-supplement.pdf]

## Answer reviewer comments for manuscript

[egusphere-2025-5010]

Comments from the reviewers are marked as “**rev {reviewer no./comment no.}**” in italicized font. The answers of the authors are indented and follow immediately after the reviewer comments. General statements made by the reviewers are not reproduced here. **highlighted** and ~~striketrough~~ text shows changes in the manuscript. Line numbers (L) mentioned in our replies correspond to the original single-column (unrevised) version of the manuscript.

### Reviewer 1

#### Specific comments

**rev 2/1** *Line 122 what is PIC?*

PIC refers to a protease inhibitor cocktail, which is defined at its first mention in Line 113.

**rev 2/2** *Line 425 issues with sample foaming during injection into analytic systems. This is not really a comment on the manuscript, just a suggestion for subsequent analyses: try adding antifoam A to the acid instead of using centrifugal filters; there will be less chance of introducing atmospheric CO<sub>2</sub>.*

We thank the reviewer for this helpful suggestion. We will test the addition of Antifoam A to the acid in future analyses. If successful, this approach would eliminate the centrifugation step, thereby saving time and reducing the potential for atmospheric CO<sub>2</sub> contamination.
